# Supplementary material
Source: PubMed Central journal article supplement (PMC10165732)
Supplement: NIHMS1889181-supplement-Supplemental_Material_1.pdf [file NIHMS1889181-supplement-Supplemental_Material_1.pdf]

Supplementary Table 1. Descriptive Statistics for Additional Efficacy Outcomes

| <b>Outcome</b>                                    | <b>Visit</b> | <b>Condition</b> | <b>Mean</b> | <b>SD</b> |
|---------------------------------------------------|--------------|------------------|-------------|-----------|
| BRIEF-2 Global Executive Composite (GEC)          | Follow-up    | Intervention     | 57.18       | 9.020     |
|                                                   |              | Control          | 54.50       | 11.23     |
| BRIEF-2 Behavioral Regulation Index (BRI)         | Follow-up    | Intervention     | 58.36       | 9.00      |
|                                                   |              | Control          | 53.33       | 13.35     |
| BRIEF-2 Emotional Regulation Index (ERI)          | Follow-up    | Intervention     | 57.36       | 11.43     |
|                                                   |              | Control          | 53.00       | 9.57      |
| BRIEF-2 Cognitive Regulation Index (CRI)          | Follow-up    | Intervention     | 55.45       | 9.69      |
|                                                   |              | Control          | 54.83       | 10.98     |
| PedsQL Parent – Total Score                       | Follow-up    | Intervention     | 67.93       | 18.70     |
|                                                   |              | Control          | 69.73       | 13.22     |
| PedsQL Parent – Psychosocial Health Summary Score | Follow-up    | Intervention     | 65.38       | 16.54     |
|                                                   |              | Control          | 67.48       | 15.43     |
| PedsQL Parent – Physical Health Summary Score     | Follow-up    | Intervention     | 72.90       | 27.36     |
|                                                   |              | Control          | 74.03       | 15.43     |
| PedsQL Child – Total Score                        | Follow-up    | Intervention     | 73.77       | 11.74     |
|                                                   |              | Control          | 73.78       | 11.95     |
| PedsQL Child – Psychosocial Health Summary Score  | Follow-up    | Intervention     | 75.48       | 10.47     |
|                                                   |              | Control          | 74.16       | 15.43     |
| PedsQL Child – Physical Health Summary Score      | Follow-up    | Intervention     | 70.97       | 26.03     |
|                                                   |              | Control          | 70.05       | 22.55     |

Note. BRIEF2 and PedsQL were only administered at the follow-up visit in the present study.
